# Supplementary material
Source: PubMed Central journal article supplement (PMC3568360)
Supplement: 1212424110_sd01.pdf [file 1212424110_sd01.pdf]

| Sample_ID                                          | Metadata |           |           |                   | No. of sequeces | Richness                 |                   |                     | SRA                     |                       |
|----------------------------------------------------|----------|-----------|-----------|-------------------|-----------------|--------------------------|-------------------|---------------------|-------------------------|-----------------------|
|                                                    | Latitude | Longitude | Depth (m) | Temperature (SST) |                 | Estimate from best model | Confidence bounds | Total observed OTUs |                         | Best parametric model |
| ICM_ABR_Bv6.ABR_0001_2005_01_02                    | -64.50   | -170.00   | 0         | 0.0               | 12535           | 448.5                    | 61.5              | 220                 | Three mixed exponential | SRX011052             |
| ICM_ABR_Bv6.ABR_0005_2005_01_07                    | -50.00   | -170.00   | 0         | 11.3              | 21564           | 1070.9                   | 198.3             | 360                 | Three mixed exponential | SRX011054             |
| ICM_ABR_Bv6.ABR_0009_2005_01_30                    | -20.00   | -170.00   | 0         | 28.6              | 21973           | 2054.3                   | 419.8             | 667                 | Three mixed exponential | SRX011056             |
| ICM_ABR_Bv6.ABR_0013_2005_02_26                    | 0.08     | -170.00   | 0         | 28.7              | 21189           | 1976.5                   | 165.6             | 850                 | Three mixed exponential | SRX011058             |
| ICM_ACB_Bv6.ACB_0001_2007_07_13                    | 71.45    | -156.06   | 2         | 0.3               | 15764           | 1840.8                   | 331.9             | 641                 | Four mixed exponential  | SRX011065             |
| ICM_ACB_Bv6.ACB_0002_2007_07_11                    | 71.43    | -156.86   | 2         | -0.5              | 9193            | 876.4                    | 273.5             | 257                 | Three mixed exponential | SRX011066             |
| ICM_ACB_Bv6.ACB_0003_2008_01_26                    | 71.35    | -156.68   | 2         | -1.8              | 17756           | 545.7                    | 92.2              | 278                 | Three mixed exponential | SRX011067             |
| ICM_ACB_Bv6.ACB_0004_2008_01_30                    | 71.35    | -156.68   | 2         | -1.8              | 19346           | 1579.5                   | 231.8             | 588                 | Three mixed exponential | SRX011068             |
| ICM_ACB_Bv6.ACB_0005_2002_07_29                    | 72.32    | -151.98   | 10        | 0.8               | 20865           | 1354.9                   | 444.8             | 384                 | Three mixed exponential | SRX011069             |
| ICM_ACB_Bv6.ACB_0006_2002_08_06                    | 72.32    | -151.98   | 10        | 1.1               | 15288           | 675.1                    | 91.2              | 316                 | Three mixed exponential | SRX011070             |
| ICM_ACB_Bv6.ACB_0007_2004_07_30                    | 71.54    | -150.89   | 8.4       | 1.3               | 17977           | 468.3                    | 43.9              | 264                 | Two mixed exponential   | SRX011071             |
| ICM_ACB_Bv6.ACB_0008_2004_08_21                    | 72.42    | -152.02   | 39.7      | 1.6               | 14653           | 528.1                    | 162.3             | 240                 | Three mixed exponential | SRX011072             |
| ICM_ACB_Bv6.ACB_0013_2004_01_17                    | 70.04    | -126.30   | 3         | -1.8              | 12555           | 1234.3                   | 169               | 475                 | Three mixed exponential | SRX011073             |
| ICM_ACB_Bv6.ACB_0015_2004_07_16                    | 70.05    | -126.31   | 1.5       | 3.5               | 51069           | 1859.6                   | 211               | 700                 | Three mixed exponential | SRX011074             |
| ICM_ACB_Bv6.ACB_0016_2008_01_28                    | 71.35    | -156.68   | 2         | -1.8              | 19348           | 2863.2                   | 673.6             | 714                 | Four mixed exponential  | SRX011075             |
| ICM_AOT_Bv6.AOT_0001_2008_11_07                    | 42.85    | -11.64    | 47        | 16.7              | 24363           | 2236.2                   | 393.6             | 769                 | Three mixed exponential | SRX011096             |
| ICM_AOT_Bv6.AOT_0003_2008_11_09                    | 37.13    | -13.36    | 73        | 19.2              | 22925           | 2286.3                   | 317.1             | 932                 | Three mixed exponential | SRX011098             |
| ICM_AOT_Bv6.AOT_0004_2008_11_14                    | 22.51    | -20.50    | 89        | 23.6              | 25014           | 1909.1                   | 166.4             | 888                 | Three mixed exponential | SRX011099             |
| ICM_AOT_Bv6.AOT_0005_2008_11_16                    | 14.76    | -30.00    | 7         | 26.4              | 21648           | 1790.8                   | 421.1             | 573                 | Three mixed exponential | SRX011100             |
| ICM_AOT_Bv6.AOT_0006_2008_11_29                    | -23.71   | 8.52      | 28        | 18.9              | 18113           | 980.9                    | 59.6              | 519                 | Two mixed exponential   | SRX011101             |
| ICM_AOT_Bv6.AOT_0007_2008_11_17                    | 44.70    | -20.36    | 7         | 15.3              | 26900           | 3590                     | 834.6             | 649                 | Four mixed exponential  | SRX011102             |
| ICM_AOT_Bv6.AOT_0008_2008_11_17                    | 10.63    | -20.13    | 100       | 28.3              | 10704           | 2011.7                   | 240.9             | 746                 | Three mixed exponential | SRX011103             |
| ICM_AOT_Bv6.AOT_0009_2008_11_17                    | 10.63    | -20.13    | 48        | 28.3              | 43489           | 2567.5                   | 224.3             | 1033                | Three mixed exponential | SRX011104             |
| ICM_AOT_Bv6.AOT_0010_2008_11_17                    | 10.37    | -20.06    | 11        | 28.4              | 20534           | 1525.8                   | 296.4             | 521                 | Three mixed exponential | SRX011105             |
| ICM_AOT_Bv6.AOT_0011_2008_11_17                    | 10.37    | -20.06    | 200       | 28.4              | 8894            | 2089.2                   | 225.2             | 730                 | Three mixed exponential | SRX011106             |
| ICM_AOT_Bv6.AOT_0013_2008_11_18                    | 8.50     | -19.50    | 7         | 28.7              | 23329           | 1137.4                   | 86.9              | 536                 | Two mixed exponential   | SRX011108             |
| ICM_AOT_Bv6.AOT_0015_2008_11_20                    | 2.47     | -14.15    | 45        | 27.1              | 8433            | 1212.2                   | 204.6             | 434                 | Two mixed exponential   | SRX011110             |
| ICM_AOT_Bv6.AOT_0016_2008_11_27                    | -17.74   | 3.13      | 48        | 19.9              | 17059           | 790.2                    | 73.7              | 391                 | Two mixed exponential   | SRX011111             |
| ICM_ASA_Bv6.ASA_0001_2007_12_18 (> 3 micron sizes) | -73.94   | -115.68   | 9         | -1.2              | 11500           | 269.7                    | 65                | 147                 | Two mixed exponential   | SRX011120             |
| ICM_ASA_Bv6.ASA_0002_2007_12_18 (< 3 micron sizes) | -73.94   | -115.68   | 9         | -1.2              | 15563           | 334.6                    | 136               | 131                 | Three mixed exponential | SRX011121             |
| ICM_ASA_Bv6.ASA_0003_2007_12_18 (> 3 micron sizes) | -73.94   | -115.68   | 19        | -1.2              | 10140           | 285.2                    | 29.1              | 164                 | Two mixed exponential   | SRX011122             |
| ICM_ASA_Bv6.ASA_0004_2007_12_18 (> 3 micron sizes) | -73.94   | -115.68   | 19        | -1.2              | 4566            | 87.4                     | 7.9               | 61                  | Single exponential      | SRX011123             |
| ICM_ASA_Bv6.ASA_0005_2007_12_18 (> 3 micron sizes) | -73.94   | -115.68   | 34        | -1.2              | 9764            | 300.1                    | 47.7              | 151                 | Two mixed exponential   | SRX011124             |
| ICM_ASA_Bv6.ASA_0006_2007_12_18 (< 3 micron sizes) | -73.94   | -115.68   | 34        | -1.2              | 21805           | 192.7                    | 18                | 119                 | Two mixed exponential   | SRX011125             |
| ICM_ASA_Bv6.ASA_0007_2007_12_18                    | -73.94   | -115.68   | 49        | -1.2              | 12244           | 186.1                    | 23.6              | 105                 | Two mixed exponential   | SRX011126             |
| ICM_ASA_Bv6.ASA_0008_2007_12_18 (> 3 micron sizes) | -73.94   | -115.68   | 99        | -1.2              | 10628           | 247.5                    | 33.4              | 126                 | Two mixed exponential   | SRX011127             |
| ICM_ASA_Bv6.ASA_0009_2007_12_18 (< 3 micron sizes) | -73.94   | -115.68   | 99        | -1.2              | 7518            | 240.2                    | 94.3              | 79                  | Two mixed exponential   | SRX011128             |
| ICM_AWP_Bv6.AWP_0001_2007_08_23                    | 36.05    | -28.35    | 0         | 24.5              | 16792           | 777.2                    | 64.4              | 445                 | Three mixed exponential | SRX011429             |
| ICM_AWP_Bv6.AWP_0003_2007_08_25                    | 34.21    | -32.12    | 0         | 25.7              | 20912           | 1277.5                   | 145.3             | 519                 | Three mixed exponential | SRX011430             |
| ICM_AWP_Bv6.AWP_0006_2007_08_25                    | 34.21    | -32.12    | 0         | 25.7              | 19400           | 1526.5                   | 539.2             | 402                 | Four mixed exponential  | SRX011431             |
| ICM_AWP_Bv6.AWP_0007_2007_08_25                    | 35.48    | -32.43    | 0         | 25.3              | 16709           | 649.4                    | 145.6             | 369                 | Three mixed exponential | SRX011432             |
| ICM_AWP_Bv6.AWP_0008_2007_08_26                    | 37.48    | -30.57    | 0         | 24.2              | 24652           | 795.9                    | 92.5              | 433                 | Three mixed exponential | SRX011433             |

| Sample_ID                       | Metadata |           |           |                   | No. of sequeces | Richness                 |                   |                     | SRA                        |                       |
|---------------------------------|----------|-----------|-----------|-------------------|-----------------|--------------------------|-------------------|---------------------|----------------------------|-----------------------|
|                                 | Latitude | Longitude | Depth (m) | Temperature (SST) |                 | Estimate from best model | Confidence bounds | Total observed OTUs |                            | Best parametric model |
| ICM_AWP_Bv6.AWP_0013_2007_06_11 | 37.34    | -18.88    | 100       | 19.0              | 21392           | 1751.2                   | 228.1             | 748                 | Two mixed exponential      | SRX011438             |
| ICM_AWP_Bv6.AWP_0014_2007_06_11 | 37.34    | -18.88    | 0         | 19.0              | 24138           | 789.5                    | 40.1              | 487                 | Two mixed exponential      | SRX011439             |
| ICM_AWP_Bv6.AWP_0016_2007_06_02 | 31.86    | -27.88    | 100       | 21.2              | 27367           | 2879.1                   | 235.3             | 1471                | Three mixed exponential    | SRX011441             |
| ICM_BMO_Bv6.BMO_0001_2007_09_20 | 41.67    | 2.80      | 0.5       | 23.0              | 12740           | 577.9                    | 18.9              | 449                 | Two mixed exponential      | SRX011134             |
| ICM_BMO_Bv6.BMO_0002_2007_09_20 | 41.65    | 2.80      | 5         | 23.0              | 18405           | 1022.7                   | 156               | 432                 | Three mixed exponential    | SRX011135             |
| ICM_BMO_Bv6.BMO_0003_2007_09_21 | 41.40    | 2.80      | 5         | 23.2              | 22302           | 648.4                    | 88.1              | 331                 | Three mixed exponential    | SRX011136             |
| ICM_BMO_Bv6.BMO_0004_2007_09_21 | 41.15    | 2.82      | 5         | 23.6              | 17334           | 515.9                    | 35.2              | 351                 | Three mixed exponential    | SRX011137             |
| ICM_BMO_Bv6.BMO_0005_2007_09_22 | 40.91    | 2.85      | 4         | 22.9              | 22993           | 854.6                    | 106.9             | 460                 | Three mixed exponential    | SRX011138             |
| ICM_BMO_Bv6.BMO_0006_2007_09_23 | 40.65    | 2.85      | 5         | 23.4              | 21937           | 629                      | 36.2              | 391                 | Two mixed exponential      | SRX011139             |
| ICM_BMO_Bv6.BMO_0007_2007_09_23 | 40.65    | 2.85      | 25        | 23.4              | 13451           | 567.6                    | 28.5              | 378                 | Two mixed exponential      | SRX011140             |
| ICM_BMO_Bv6.BMO_0008_2007_09_23 | 40.65    | 2.85      | 65        | 23.4              | 22744           | 1342.9                   | 152.4             | 677                 | Three mixed exponential    | SRX011141             |
| ICM_BMO_Bv6.BMO_0012_2007_09_21 | 41.40    | 2.80      | 44        | 23.2              | 20926           | 763.8                    | 40.7              | 505                 | Three mixed exponential    | SRX011145             |
| ICM_BMO_Bv6.BMO_0013_2007_09_21 | 40.66    | 2.86      | 44        | 23.9              | 12814           | 1613.8                   | 128.1             | 767                 | Two mixed exponential      | SRX011146             |
| ICM_BMO_Bv6.BMO_0014_2007_09_23 | 40.65    | 2.85      | 65        | 23.4              | 18427           | 1350.1                   | 429               | 642                 | Three mixed exponential    | SRX011147             |
| ICM_BMO_Bv6.BMO_0015_2007_09_23 | 40.65    | 2.85      | 5         | 23.4              | 13282           | 901.4                    | 53.2              | 559                 | Three mixed exponential    | SRX011148             |
| ICM_BMO_Bv6.BMO_0016_2007_09_20 | 41.65    | 2.80      | 5         | 23.0              | 10299           | 1274.7                   | 121               | 570                 | Three mixed exponential    | SRX011149             |
| ICM_CAM_Bv6.CAM_0001_2002_01_17 | -64.77   | -64.05    | 3         | 0.3               | 23758           | 1533.9                   | 451.4             | 369                 | Three mixed exponential    | SRX011154             |
| ICM_CAM_Bv6.CAM_0002_2002_07_17 | -64.77   | -64.05    | 3         | -1.0              | 10913           | 1551                     | 237.6             | 656                 | Three mixed exponential    | SRX011155             |
| ICM_CAM_Bv6.CAM_0003_2002_08_20 | -64.77   | -64.05    | 3         | -1.2              | 13014           | 2049.3                   | 169.3             | 848                 | Three mixed exponential    | SRX011156             |
| ICM_CAM_Bv6.CAM_0004_2006_02_28 | -64.77   | -64.07    | 3         | 0.4               | 22117           | 386.4                    | 27.6              | 225                 | Two mixed exponential      | SRX011157             |
| ICM_CAM_Bv6.CAM_0005_2007_07_23 | -50.67   | -68.42    | 3         | 6.3               | 39485           | 2635.4                   | 243.9             | 896                 | Two mixed exponential      | SRX011158             |
| ICM_CAM_Bv6.CAM_0006_2007_10_09 | -50.67   | -68.42    | 3         | 6.0               | 31816           | 1531.3                   | 152               | 585                 | Three mixed exponential    | SRX011159             |
| ICM_CAM_Bv6.CAM_0007_2007_02_07 | -50.67   | -68.42    | 3         | 11.7              | 19064           | 940.5                    | 89.6              | 436                 | 2b:Three mixed exponential | SRX011160             |
| ICM_CAM_Bv6.CAM_0008_2007_05_04 | -50.67   | -68.42    | 3         | 9.3               | 24711           | 2030.3                   | 430.5             | 569                 | Three mixed exponential    | SRX011161             |
| ICM_CAM_Bv6.CAM_0009_2000_03_23 | -55.13   | -2.89     | 11        | 0.8               | 20620           | 1404.3                   | 374.8             | 385                 | Three mixed exponential    | SRX011162             |
| ICM_CAM_Bv6.CAM_0010_2000_03_25 | -59.32   | -0.40     | 11        | 0.0               | 29163           | 940.4                    | 428.3             | 287                 | Two mixed exponential      | SRX011163             |
| ICM_CAM_Bv6.CAM_0011_2000_03_26 | -67.02   | -5.47     | 11        | -0.5              | 19721           | 583.1                    | 97.4              | 237                 | Three mixed exponential    | SRX011164             |
| ICM_CAM_Bv6.CAM_0012_2000_03_29 | -71.18   | -12.46    | 5         | -1.4              | 21393           | 816.4                    | 136.9             | 313                 | Two mixed exponential      | SRX011165             |
| ICM_CAM_Bv6.CAM_0013_2008_02_04 | -59.40   | 175.56    | 10        | 5.8               | 14676           | 792.5                    | 370.2             | 241                 | Three mixed exponential    | SRX011166             |
| ICM_CAM_Bv6.CAM_0014_2008_02_06 | -65.01   | 179.97    | 10        | 1.4               | 17892           | 942.6                    | 309.6             | 269                 | Three mixed exponential    | SRX011167             |
| ICM_CAM_Bv6.CAM_0015_2008_02_29 | -69.43   | -179.09   | 5         | -0.6              | 23101           | 699.8                    | 62.6              | 354                 | Two mixed exponential      | SRX011168             |
| ICM_CAM_Bv6.CAM_0016_2008_02_13 | -75.66   | 169.77    | 10        | -0.2              | 19298           | 1292.2                   | 584.8             | 351                 | Three mixed exponential    | SRX011169             |
| ICM_CCB_Bv6.CCB_0008_2008_03_26 | 9.25     | -82.13    | 1         | 28.2              | 42335           | 5618.2                   | 1958.3            | 1269                | Four mixed exponential     | SRX010980             |
| ICM_CNE_Bv6.CNE_0001_2003_04_14 | 42.71    | -70.80    | 0         | 5.0               | 14530           | 4566.1                   | 847.7             | 828                 | Three mixed exponential    | SRX011212             |
| ICM_CNE_Bv6.CNE_0002_2003_07_03 | 42.71    | -70.80    | 0         | 14.0              | 14901           | 3104.6                   | 440.5             | 677                 | Two mixed exponential      | SRX011213             |
| ICM_CNE_Bv6.CNE_0003_2003_10_11 | 42.71    | -70.80    | 0         | 13.5              | 15680           | 2865.5                   | 780               | 675                 | Three mixed exponential    | SRX011214             |
| ICM_CNE_Bv6.CNE_0004_2004_01_22 | 42.71    | -70.80    | 0         | -1.0              | 9717            | 8034.4                   | 1413              | 1406                | Three mixed exponential    | SRX011215             |
| ICM_FIS_Bv6.FIS_0015_2008_04_12 | 55.03    | 8.44      | 0         | 6.2               | 11441           | 2624.9                   | 282.6             | 859                 | Three mixed exponential    | SRX011889             |
| ICM_FIS_Bv6.FIS_0016_2008_04_12 | 55.03    | 8.44      | 0         | 6.2               | 12441           | 3152.9                   | 389               | 942                 | Three mixed exponential    | SRX011890             |
| ICM_GOA_Bv6.GOA_0001_2006_09_05 | 29.47    | 34.92     | 20        | 28.2              | 16096           | 629.8                    | 41.3              | 354                 | Two mixed exponential      | SRX011803             |
| ICM_GOA_Bv6.GOA_0002_2006_10_17 | 29.47    | 34.92     | 20        | 26.6              | 23824           | 1550.3                   | 407.7             | 629                 | Four mixed exponential     | SRX011804             |
| ICM_GOA_Bv6.GOA_0003_2006_11_19 | 29.47    | 34.92     | 5         | 24.5              | 20189           | 3094.3                   | 1533              | 769                 | Four mixed exponential     | SRX011805             |
| ICM_GOA_Bv6.GOA_0004_2006_12_13 | 29.47    | 34.92     | 5         | 22.8              | 19319           | 2391.1                   | 541.9             | 765                 | Three mixed exponential    | SRX011806             |

| Sample_ID                       | Metadata |           |           |                   | No. of sequeces | Richness                 |                   |                     | SRA                        |                       |
|---------------------------------|----------|-----------|-----------|-------------------|-----------------|--------------------------|-------------------|---------------------|----------------------------|-----------------------|
|                                 | Latitude | Longitude | Depth (m) | Temperature (SST) |                 | Estimate from best model | Confidence bounds | Total observed OTUs |                            | Best parametric model |
| ICM_GOA_Bv6.GOA_0005_2007_01_15 | 29.47    | 34.92     | 5         | 21.3              | 20711           | 2242.7                   | 372.5             | 801                 | Three mixed exponential    | SRX011807             |
| ICM_GOA_Bv6.GOA_0006_2007_02_12 | 29.47    | 34.92     | 5         | 20.3              | 12559           | 1239.8                   | 95.1              | 666                 | Three mixed exponential    | SRX011808             |
| ICM_GOA_Bv6.GOA_0007_2007_03_15 | 29.47    | 34.92     | 5         | 20.4              | 19055           | 1663.8                   | 433.5             | 629                 | Three mixed exponential    | SRX011809             |
| ICM_GOA_Bv6.GOA_0008_2007_04_16 | 29.47    | 34.92     | 5         | 21.9              | 13745           | 2012.8                   | 867.9             | 564                 | Three mixed exponential    | SRX011810             |
| ICM_GOA_Bv6.GOA_0009_2007_05_14 | 29.47    | 34.92     | 5         | 23.5              | 11370           | 840.3                    | 138.8             | 348                 | Three mixed exponential    | SRX011811             |
| ICM_GOA_Bv6.GOA_0010_2007_06_19 | 29.47    | 34.92     | 5         | 26.1              | 16116           | 540.7                    | 44.4              | 312                 | Two mixed exponential      | SRX011812             |
| ICM_GOA_Bv6.GOA_0011_2007_09_18 | 29.47    | 34.92     | 20        | 27.7              | 6552            | 528.9                    | 28.1              | 335                 | Two mixed exponential      | SRX011813             |
| ICM_GOA_Bv6.GOA_0012_2007_12_18 | 29.47    | 34.92     | 5         | 22.8              | 23530           | 2971.6                   | 305.6             | 1046                | Three mixed exponential    | SRX011814             |
| ICM_GOA_Bv6.GOA_0013_2007_07_24 | 29.47    | 34.92     | 20        | 27.9              | 18231           | 1248.6                   | 345.6             | 436                 | Three mixed exponential    | SRX011815             |
| ICM_GOA_Bv6.GOA_0014_2007_07_24 | 29.47    | 34.92     | 100       | 27.9              | 20983           | 1525.8                   | 229.4             | 650                 | Three mixed exponential    | SRX011816             |
| ICM_GOA_Bv6.GOA_0015_2007_07_24 | 29.47    | 34.92     | 125       | 27.9              | 29014           | 4580.9                   | 1972.9            | 879                 | Four mixed exponential     | SRX011817             |
| ICM_HCW_Bv6.HCW_0001_2007_04_04 | 47.55    | -123.01   | 0         | 10.7              | 14743           | 1505.7                   | 324.5             | 341                 | 2b:Two mixed exponential   | SRX011264             |
| ICM_HCW_Bv6.HCW_0002_2007_04_04 | 47.55    | -123.01   | 145       | 8.9               | 14898           | 2992                     | 285.2             | 1020                | Three mixed exponential    | SRX011265             |
| ICM_HCW_Bv6.HCW_0003_2007_04_06 | 47.36    | -123.02   | 5         | 9.0               | 10482           | 768.8                    | 93.9              | 281                 | Two mixed exponential      | SRX011266             |
| ICM_HCW_Bv6.HCW_0004_2007_04_06 | 47.36    | -123.02   | 50        | 9.0               | 14739           | 5105                     | 628.7             | 1238                | Three mixed exponential    | SRX011267             |
| ICM_HCW_Bv6.HCW_0005_2007_06_11 | 47.89    | -122.60   | 0         | 12.9              | 14019           | 5975.4                   | 5064.6            | 442                 | Two mixed exponential      | SRX011268             |
| ICM_HCW_Bv6.HCW_0006_2007_06_11 | 47.89    | -122.60   | 124       | 12.4              | 11108           | 1899.9                   | 393.9             | 524                 | Three mixed exponential    | SRX011269             |
| ICM_HCW_Bv6.HCW_0007_2007_06_13 | 47.55    | -123.01   | 0         | 13.0              | 6729            | 1324.6                   | 274.5             | 354                 | Three mixed exponential    | SRX011270             |
| ICM_HCW_Bv6.HCW_0008_2007_06_13 | 47.55    | -123.01   | 144       | 12.7              | 11545           | 2849.4                   | 493.1             | 802                 | Three mixed exponential    | SRX011271             |
| ICM_HCW_Bv6.HCW_0009_2007_06_13 | 47.36    | -123.02   | 0         | 14.6              | 7077            | 1864.4                   | 420.5             | 355                 | Four mixed exponential     | SRX011272             |
| ICM_HCW_Bv6.HCW_0010_2007_06_13 | 47.36    | -123.02   | 40        | 12.6              | 10368           | 6412.9                   | 2523.8            | 981                 | Four mixed exponential     | SRX011273             |
| ICM_HCW_Bv6.HCW_0011_2007_06_13 | 47.40    | -122.93   | 0         | 16.6              | 11595           | 1121.8                   | 215.9             | 318                 | Two mixed exponential      | SRX011274             |
| ICM_HCW_Bv6.HCW_0012_2007_06_13 | 47.40    | -122.93   | 11.7      | 9.8               | 8379            | 2176.6                   | 834.8             | 491                 | Three mixed exponential    | SRX011275             |
| ICM_HCW_Bv6.HCW_0013_2007_10_23 | 47.55    | -123.01   | 0         | 10.7              | 3663            | 2237.5                   | 641.8             | 447                 | Two mixed exponential      | SRX011276             |
| ICM_HCW_Bv6.HCW_0014_2007_10_23 | 47.55    | -123.01   | 140       | 11.2              | 11445           | 1995.5                   | 130.4             | 873                 | 2b:Three mixed exponential | SRX011277             |
| ICM_HCW_Bv6.HCW_0015_2007_10_23 | 47.36    | -123.02   | 0         | 11.0              | 4446            | 1103                     | 242.4             | 265                 | Two mixed exponential      | SRX011278             |
| ICM_HCW_Bv6.HCW_0016_2007_10_23 | 47.36    | -123.02   | 50        | 11.3              | 9795            | 3755.6                   | 538.6             | 987                 | Three mixed exponential    | SRX011279             |
| ICM_LCR_Bv6.LCR_0002_2009_01_13 | 17.97    | -67.01    | 0.1       | 26.0              | 7733            | 2867.3                   | 570               | 605                 | Three mixed exponential    | SRX011449             |
| ICM_LCR_Bv6.LCR_0004_2008_09_22 | -34.79   | -57.34    | 0.5       | 23.0              | 16209           | 1966.5                   | 156.5             | 917                 | Three mixed exponential    | SRX011451             |
| ICM_LCR_Bv6.LCR_0009_2008_04_25 | -34.58   | -54.28    | 0.5       | 19.0              | 25352           | 4517.9                   | 830.2             | 966                 | Three mixed exponential    | SRX011453             |
| ICM_LCR_Bv6.LCR_0010_2008_04_25 | -34.67   | -54.27    | 0.6       | 20.0              | 18974           | 5879.2                   | 2248.5            | 910                 | Four mixed exponential     | SRX011454             |
| ICM_LCR_Bv6.LCR_0011_2006_06_29 | -36.17   | -55.27    | 2         | 11.7              | 31278           | 1952.6                   | 571.1             | 571                 | Three mixed exponential    | SRX011455             |
| ICM_LCR_Bv6.LCR_0013_2006_09_01 | -38.69   | -57.68    | 5         | 8.2               | 16836           | 604.5                    | 49.8              | 293                 | Two mixed exponential      | SRX011456             |
| ICM_MPI_Bv6.MPI_0001_2004_05_06 | 54.19    | 7.90      | 1         | 9.4               | 11771           | 1071.7                   | 340.5             | 307                 | Three mixed exponential    | SRX011280             |
| ICM_MPI_Bv6.MPI_0002_2004_05_06 | 54.19    | 7.90      | 1         | 9.4               | 527             | 431.3                    | 70.4              | 143                 | Two mixed exponential      | SRX011281             |
| ICM_MPI_Bv6.MPI_0003_2005_05_31 | 54.19    | 7.90      | 1         | 12.4              | 14924           | 760.4                    | 220.2             | 276                 | Three mixed exponential    | SRX011282             |
| ICM_MPI_Bv6.MPI_0004_2005_05_31 | 54.19    | 7.90      | 1         | 12.4              | 12215           | 2359.1                   | 392.9             | 712                 | Three mixed exponential    | SRX011283             |
| ICM_MPI_Bv6.MPI_0005_2007_03_05 | 54.19    | 7.90      | 1         | 4.4               | 7692            | 1989.5                   | 192.6             | 732                 | Three mixed exponential    | SRX011284             |
| ICM_MPI_Bv6.MPI_0006_2007_05_21 | 54.19    | 7.90      | 1         | 11.4              | 8407            | 2837                     | 778.5             | 765                 | Three mixed exponential    | SRX011285             |
| ICM_MPI_Bv6.MPI_0007_2007_05_21 | 54.19    | 7.90      | 1         | 11.4              | 12003           | 1682.4                   | 361.9             | 478                 | 2b:Three mixed exponential | SRX011286             |
| ICM_MPI_Bv6.MPI_0008_2007_07_24 | 54.19    | 7.90      | 1         | 17.3              | 14620           | 992.9                    | 217.2             | 350                 | Three mixed exponential    | SRX011287             |
| ICM_MPI_Bv6.MPI_0009_2004_05_17 | 54.19    | 7.90      | 1         | 11.4              | 9313            | 678.6                    | 178.5             | 200                 | Two mixed exponential      | SRX011288             |
| ICM_MPI_Bv6.MPI_0010_2004_05_17 | 54.19    | 7.90      | 1         | 11.4              | 2084            | 932.2                    | 219.6             | 253                 | Three mixed exponential    | SRX011289             |

| Sample_ID                          | Metadata |           |           |                   | No. of sequeces | Richness                 |                   |                     | SRA                        |               |
|------------------------------------|----------|-----------|-----------|-------------------|-----------------|--------------------------|-------------------|---------------------|----------------------------|---------------|
|                                    | Latitude | Longitude | Depth (m) | Temperature (SST) |                 | Estimate from best model | Confidence bounds | Total observed OTUs | Best parametric model      | Accession no. |
| ICM_MPI_Bv6.MPI_0011_2004_05_24    | 54.19    | 7.90      | 1         | 12.4              | 20900           | 1562.3                   | 351.6             | 372                 | Three mixed exponential    | SRX011290     |
| ICM_MPI_Bv6.MPI_0012_2004_05_24    | 54.19    | 7.90      | 1         | 12.4              | 4621            | 1606.5                   | 409.9             | 343                 | Three mixed exponential    | SRX011291     |
| ICM_MPI_Bv6.MPI_0013_2005_05_17    | 54.19    | 7.90      | 1         | 11.4              | 10206           | 1132.1                   | 416               | 274                 | Two mixed exponential      | SRX011292     |
| ICM_MPI_Bv6.MPI_0014_2004_05_17    | 54.19    | 7.90      | 1         | 11.4              | 15793           | 3094.2                   | 387.6             | 975                 | Three mixed exponential    | SRX011293     |
| ICM_MPI_Bv6.MPI_0015_2004_05_24    | 54.19    | 7.90      | 1         | 11.4              | 27409           | 973.1                    | 182.6             | 329                 | Two mixed exponential      | SRX011294     |
| ICM_MPI_Bv6.MPI_0016_2004_05_24    | 54.19    | 7.90      | 1         | 11.4              | 23558           | 2111.5                   | 266.5             | 646                 | Three mixed exponential    | SRX011295     |
| ICM_PML_Bv6.PML_0001_2007_02_16    | 50.20    | -4.22     | 0         | 10.0              | 12347           | 1868.1                   | 185.5             | 843                 | Three mixed exponential    | SRP001108     |
| ICM_PML_Bv6.PML_0002_2007_03_07    | 50.20    | -4.22     | 0         | 10.3              | 8973            | 3411.1                   | 269.2             | 1157                | Three mixed exponential    | SRP001109     |
| ICM_PML_Bv6.PML_0003_2007_03_26    | 50.20    | -4.22     | 0         | 10.3              | 5852            | 1281.7                   | 134.6             | 566                 | Three mixed exponential    | SRP001110     |
| ICM_PML_Bv6.PML_0004_2007_04_23    | 50.25    | -4.22     | 0         | 11.8              | 7268            | 1012.4                   | 400.5             | 305                 | Two mixed exponential      | SRP001111     |
| ICM_PML_Bv6.PML_0005_2007_05_08    | 50.25    | -4.22     | 0         | 12.4              | 8179            | 947.4                    | 93.4              | 425                 | 2b:Three mixed exponential | SRP001112     |
| ICM_PML_Bv6.PML_0006_2007_06_04    | 50.25    | -4.13     | 0         | 14.0              | 12297           | 698.8                    | 204.6             | 306                 | Four mixed exponential     | SRP001113     |
| ICM_PML_Bv6.PML_0007_2007_06_25    | 50.25    | -4.13     | 0         | 15.2              | 10027           | 530.4                    | 32.9              | 332                 | Two mixed exponential      | SRP001114     |
| ICM_PML_Bv6.PML_0008_2007_07_30    | 50.25    | -4.13     | 0         | 15.5              | 11529           | 1269.3                   | 342.1             | 423                 | Three mixed exponential    | SRP001115     |
| ICM_PML_Bv6.PML_0009_2007_08_20    | 50.25    | -4.13     | 0         | 15.5              | 12344           | 795.3                    | 114.3             | 368                 | Three mixed exponential    | SRP001116     |
| ICM_PML_Bv6.PML_0010_2007_09_29    | 50.25    | -4.13     | 0         | 16.0              | 12772           | 1095.2                   | 126.6             | 523                 | Three mixed exponential    | SRP001117     |
| ICM_PML_Bv6.PML_0011_2007_10_25    | 50.25    | -4.13     | 0         | 15.4              | 11286           | 1297.7                   | 133.4             | 601                 | Three mixed exponential    | SRP001118     |
| ICM_PML_Bv6.PML_0012_2007_12_12    | 50.25    | -4.13     | 0         | 13.9              | 13730           | 1739.5                   | 769.8             | 455                 | Three mixed exponential    | SRP001119     |
| ICM_PML_Bv6.PML_0017_2008_02_20    | 50.25    | -4.21     | 0         | 9.7               | 5827            | 2253.2                   | 851.9             | 477                 | Three mixed exponential    | SRP001120     |
| ICM_PML_Bv6.PML_0018_2008_03_05    | 50.25    | -4.21     | 0         | 9.5               | 4841            | 1893.1                   | 331.4             | 547                 | Three mixed exponential    | SRP001121     |
| ICM_PML_Bv6.PML_0019_2008_03_17    | 50.25    | -4.21     | 0         | 9.4               | 4788            | 3771.2                   | 2070.6            | 445                 | 2b:Two mixed exponential   | SRP001122     |
| ICM_PML_Bv6.PML_0020_2008_04_21    | 50.25    | -4.21     | 0         | 9.7               | 4477            | 997.9                    | 343.2             | 271                 | Three mixed exponential    | SRP001123     |
| ICM_PML_Bv6.PML_0021_2008_05_06    | 50.25    | -4.21     | 0         | 11.5              | 12018           | 1336.5                   | 171.2             | 516                 | Three mixed exponential    | SRP001124     |
| ICM_PML_Bv6.PML_0022_2008_06_02    | 50.25    | -4.21     | 0         | 14.5              | 4726            | 414.2                    | 36.5              | 221                 | 2b:Two mixed exponential   | SRP001125     |
| ICM_PML_Bv6.PML_0023_2008_06_23    | 50.25    | -4.21     | 0         | 14.3              | 6085            | 780.7                    | 72.8              | 344                 | Two mixed exponential      | SRP001126     |
| ICM_PML_Bv6.PML_0024_2008_07_21    | 50.25    | -4.21     | 0         | 14.8              | 7365            | 1031.2                   | 272.8             | 317                 | Three mixed exponential    | SRP001127     |
| ICM_PML_Bv6.PML_0025_2008_08_20    | 50.25    | -4.21     | 0         | 15.4              | 13687           | 2184.1                   | 278.7             | 672                 | Three mixed exponential    | SRP001128     |
| ICM_PML_Bv6.PML_0026_2008_09_22    | 50.25    | -4.21     | 0         | 14.6              | 5991            | 1502                     | 272.4             | 459                 | 2b:Two mixed exponential   | SRP001129     |
| ICM_PML_Bv6.PML_0027_2008_10_27    | 50.25    | -4.21     | 0         | 14.3              | 18909           | 2584.9                   | 1043.8            | 884                 | Four mixed exponential     | SRP001130     |
| ICM_PML_Bv6.PML_0028_2008_12_08    | 50.25    | -4.21     | 0         | 11.2              | 6025            | 4709.5                   | 2244.5            | 679                 | 2c:Two mixed exponential   | SRP001131     |
| ICM_PML_Bv6.PML_0029_2008_01_28_Dp | 50.25    | -4.21     | 0         | 10.1              | 5487            | 1018.7                   | 73.2              | 498                 | Two mixed exponential      | SRP001132     |
| ICM_PML_Bv6.PML_0030_2008_01_28_Np | 50.26    | -4.24     | 0         | 10.1              | 4695            | 2262.7                   | 276.1             | 646                 | Three mixed exponential    | SRP001133     |
| ICM_PML_Bv6.PML_0031_2008_08_27_Dp | 50.25    | -4.20     | 0         | 15.9              | 6774            | 796.2                    | 163.5             | 308                 | Three mixed exponential    | SRP001134     |
| ICM_PML_Bv6.PML_0032_2008_08_27_Np | 50.25    | -4.20     | 0         | 15.8              | 6553            | 800                      | 202.2             | 281                 | Three mixed exponential    | SRP001135     |
| ICM_PML_Bv6.PML_0033_2008_08_28_Np | 50.27    | -4.17     | 0         | 15.7              | 9992            | 716.3                    | 53.4              | 352                 | Two mixed exponential      | SRP001136     |
| ICM_PML_Bv6.PML_0034_2008_08_28_Dp | 50.27    | -4.15     | 0         | 15.8              | 9290            | 1287.1                   | 347.2             | 333                 | Three mixed exponential    | SRP001137     |
| ICM_PML_Bv6.PML_0035_2008_04_22_Dp | 50.25    | -4.21     | 0         | 9.7               | 6577            | 877.5                    | 176.5             | 291                 | Three mixed exponential    | SRP001138     |
| ICM_PML_Bv6.PML_0036_2008_04_22_Np | 50.25    | -4.19     | 0         | 9.6               | 4273            | 1291.6                   | 459.7             | 255                 | Four mixed exponential     | SRP001139     |
| ICM_PML_Bv6.PML_0037_2008_04_22_D  | 50.25    | -4.21     | 0         | 9.7               | 6578            | 2464.6                   | 505.2             | 626                 | Three mixed exponential    | SRP001140     |
| ICM_PML_Bv6.PML_0038_2008_01_28_D  | 50.25    | -4.21     | 0         | 10.1              | 14272           | 7282.3                   | 1603.6            | 1166                | Three mixed exponential    | SRP001141     |
| ICM_PML_Bv6.PML_39_2003_01_13      | 50.25    | 4.21      | 0         | 9.3               | 10430           | 1950.5                   | 357.8             | 568                 | Three mixed exponential    | SRP001142     |
| ICM_PML_Bv6.PML_40_2003_03_31      | 50.25    | 4.21      | 0         | 9.3               | 4707            | 873.6                    | 238               | 311                 | Three mixed exponential    | SRP001143     |
| ICM_PML_Bv6.PML_41_2003_04_28      | 50.25    | 4.21      | 0         | 9.6               | 6396            | 1084.1                   | 475.9             | 237                 | Two mixed exponential      | SRP001144     |

| Sample_ID                     | Metadata |           |           |                   | No. of sequeces | Richness                 |                   |                     | SRA                        |                       |
|-------------------------------|----------|-----------|-----------|-------------------|-----------------|--------------------------|-------------------|---------------------|----------------------------|-----------------------|
|                               | Latitude | Longitude | Depth (m) | Temperature (SST) |                 | Estimate from best model | Confidence bounds | Total observed OTUs |                            | Best parametric model |
| ICM_PML_Bv6.PML_42_2003_05_26 | 50.25    | 4.21      | 0         | 12.3              | 6264            | 500.4                    | 109               | 240                 | Three mixed exponential    | SRP001145             |
| ICM_PML_Bv6.PML_43_2003_06_09 | 50.25    | 4.21      | 0         | 14.2              | 9976            | 622.4                    | 95.7              | 252                 | Three mixed exponential    | SRP001146             |
| ICM_PML_Bv6.PML_44_2003_07_07 | 50.25    | 4.21      | 0         | 16.6              | 10864           | 3796                     | 146               | 243                 | 2c:Four mixed exponential  | SRP001147             |
| ICM_PML_Bv6.PML_45_2003_07_21 | 50.25    | 4.21      | 0         | 16.5              | 8851            | 554.9                    | 112.9             | 247                 | Three mixed exponential    | SRP001148             |
| ICM_PML_Bv6.PML_46_2003_08_04 | 50.25    | 4.21      | 0         | 15.8              | 11994           | 451.9                    | 47.4              | 218                 | 2b:Two mixed exponential   | SRP001149             |
| ICM_PML_Bv6.PML_47_2003_08_25 | 50.25    | 4.21      | 0         | 17.7              | 10334           | 1263.9                   | 540.3             | 338                 | Three mixed exponential    | SRP001150             |
| ICM_PML_Bv6.PML_48_2003_09_29 | 50.25    | 4.21      | 0         | 16.1              | 13417           | 1283.5                   | 307.4             | 427                 | Three mixed exponential    | SRP001151             |
| ICM_PML_Bv6.PML_49_2003_10_06 | 50.25    | 4.21      | 0         | 15.2              | 17112           | 1531.5                   | 233.6             | 546                 | Three mixed exponential    | SRP001152             |
| ICM_PML_Bv6.PML_50_2003_12_08 | 50.25    | 4.21      | 0         | 12.0              | 13828           | 2046.1                   | 357.9             | 674                 | Three mixed exponential    | SRP001153             |
| ICM_PML_Bv6.PML_51_2004_03_01 | 50.25    | 4.21      | 0         | 9.2               | 14053           | 2191.6                   | 789.9             | 526                 | Three mixed exponential    | SRP001154             |
| ICM_PML_Bv6.PML_52_2004_03_15 | 50.25    | 4.21      | 0         | 9.0               | 5486            | 515.7                    | 32.1              | 313                 | Two mixed exponential      | SRP001155             |
| ICM_PML_Bv6.PML_53_2004_05_03 | 50.25    | 4.21      | 0         | 12.0              | 12327           | 453.5                    | 37.3              | 262                 | Two mixed exponential      | SRP001156             |
| ICM_PML_Bv6.PML_54_2004_05_31 | 50.25    | 4.21      | 0         | 12.2              | 15382           | 499.6                    | 37.3              | 287                 | Two mixed exponential      | SRP001157             |
| ICM_PML_Bv6.PML_55_2004_06_14 | 50.25    | 4.21      | 0         | 15.6              | 5193            | 579.1                    | 149.6             | 197                 | Two mixed exponential      | SRP001158             |
| ICM_PML_Bv6.PML_56_2004_06_21 | 50.25    | 4.21      | 0         | 13.6              | 4911            | 510.1                    | 122.1             | 220                 | Three mixed exponential    | SRP001159             |
| ICM_PML_Bv6.PML_57_2004_07_26 | 50.25    | 4.21      | 0         | 16.5              | 9295            | 607.9                    | 192.6             | 200                 | Three mixed exponential    | SRP001160             |
| ICM_PML_Bv6.PML_58_2004_08_23 | 50.25    | 4.21      | 0         | 16.0              | 4545            | 5690                     | 2382.5            | 327                 | Four mixed exponential     | SRP001161             |
| ICM_PML_Bv6.PML_59_2004_10_04 | 50.25    | 4.21      | 0         | 14.0              | 8485            | 1656                     | 207.5             | 555                 | Three mixed exponential    | SRP001162             |
| ICM_PML_Bv6.PML_60_2004_10_25 | 50.25    | 4.21      | 0         | 13.5              | 11253           | 1149.7                   | 83.1              | 592                 | Three mixed exponential    | SRP001163             |
| ICM_PML_Bv6.PML_61_2004_12_06 | 50.25    | 4.21      | 0         | 11.6              | 17057           | 2072.3                   | 288.7             | 712                 | Three mixed exponential    | SRP001164             |
| ICM_PML_Bv6.PML_62_2004_12_20 | 50.25    | 4.21      | 0         | 11.8              | 5449            | 1023.5                   | 96.1              | 452                 | Two mixed exponential      | SRP001165             |
| ICM_PML_Bv6.PML_63_2005_01_24 | 50.25    | 4.21      | 0         | 10.6              | 23128           | 9216.1                   | 3632.8            | 1510                | Four mixed exponential     | SRP001166             |
| ICM_PML_Bv6.PML_64_2005_02_28 | 50.25    | 4.21      | 0         | 8.6               | 9532            | 2463.2                   | 1198.5            | 429                 | 2b:Three mixed exponential | SRP001167             |
| ICM_PML_Bv6.PML_65_2005_04_18 | 50.25    | 4.21      | 0         | 9.9               | 6079            | 947.6                    | 127.7             | 368                 | Two mixed exponential      | SRP001168             |
| ICM_PML_Bv6.PML_66_2005_05_04 | 50.25    | 4.21      | 0         | 10.9              | 7275            | 2082.1                   | 369               | 540                 | Three mixed exponential    | SRP001169             |
| ICM_PML_Bv6.PML_67_2005_06_06 | 50.25    | 4.21      | 0         | 13.0              | 6349            | 531.4                    | 35.1              | 295                 | Two mixed exponential      | SRP001170             |
| ICM_PML_Bv6.PML_68_2005_06_20 | 50.25    | 4.21      | 0         | 13.7              | 20770           | 1799.1                   | 208.4             | 685                 | Three mixed exponential    | SRP001171             |
| ICM_PML_Bv6.PML_69_2005_07_25 | 50.25    | 4.21      | 0         | 14.8              | 4709            | 926.4                    | 295.8             | 301                 | Three mixed exponential    | SRP001172             |
| ICM_PML_Bv6.PML_70_2005_08_15 | 50.25    | 4.21      | 0         | 16.3              | 5992            | 924.1                    | 258.2             | 286                 | Three mixed exponential    | SRP001173             |
| ICM_PML_Bv6.PML_71_2005_09_19 | 50.25    | 4.21      | 0         | 16.5              | 8486            | 943.5                    | 77.6              | 488                 | Three mixed exponential    | SRP001174             |
| ICM_PML_Bv6.PML_72_2005_10_17 | 50.25    | 4.21      | 0         | 15.2              | 18566           | 2260.2                   | 276.4             | 795                 | Three mixed exponential    | SRP001175             |
| ICM_PML_Bv6.PML_73_2005_11_15 | 50.25    | 4.21      | 0         | 13.4              | 15862           | 3843.4                   | 1457.2            | 957                 | Four mixed exponential     | SRP001176             |
| ICM_PML_Bv6.PML_74_2005_12_05 | 50.25    | 4.21      | 0         | 11.7              | 9609            | 4304.9                   | 805.2             | 1034                | Three mixed exponential    | SRP001177             |
| ICM_PML_Bv6.PML_75_2006_01_03 | 50.25    | 4.21      | 0         | 10.6              | 33314           | 4571.6                   | 633.4             | 1411                | Four mixed exponential     | SRP001178             |
| ICM_PML_Bv6.PML_76_2006_03_06 | 50.25    | 4.21      | 0         | 7.5               | 10122           | 1870.2                   | 544.8             | 490                 | Three mixed exponential    | SRP001179             |
| ICM_PML_Bv6.PML_77_2006_03_20 | 50.25    | 4.21      | 0         | 7.4               | 13757           | 1254                     | 99.8              | 542                 | Two mixed exponential      | SRP001180             |
| ICM_PML_Bv6.PML_78_2006_04_11 | 50.25    | 4.21      | 0         | 8.5               | 6319            | 998.3                    | 139.6             | 396                 | Three mixed exponential    | SRP001181             |
| ICM_PML_Bv6.PML_79_2006_05_04 | 50.25    | 4.21      | 0         | 10.0              | 4266            | 676                      | 151.2             | 234                 | Three mixed exponential    | SRP001182             |
| ICM_PML_Bv6.PML_80_2006_06_06 | 50.25    | 4.21      | 0         | 13.5              | 16777           | 1579.3                   | 277.2             | 541                 | Three mixed exponential    | SRP001183             |
| ICM_PML_Bv6.PML_81_2006_06_27 | 50.25    | 4.21      | 0         | 14.8              | 5261            | 922.6                    | 301.1             | 221                 | Three mixed exponential    | SRP001184             |
| ICM_PML_Bv6.PML_82_2006_07_17 | 50.25    | 4.21      | 0         | 17.7              | 4664            | 298.5                    | 28.2              | 173                 | Two mixed exponential      | SRP001185             |
| ICM_PML_Bv6.PML_83_2006_08_22 | 50.25    | 4.21      | 0         | 15.9              | 8642            | 658.5                    | 110.6             | 310                 | Three mixed exponential    | SRP001186             |
| ICM_PML_Bv6.PML_84_2006_09_12 | 50.25    | 4.21      | 0         | 17.2              | 23120           | 1324                     | 194.7             | 542                 | Three mixed exponential    | SRP001187             |

| Sample_ID                       | Metadata |           |           |                   | No. of sequeces | Richness                 |                   |                     |                             | SRA           |
|---------------------------------|----------|-----------|-----------|-------------------|-----------------|--------------------------|-------------------|---------------------|-----------------------------|---------------|
|                                 | Latitude | Longitude | Depth (m) | Temperature (SST) |                 | Estimate from best model | Confidence bounds | Total observed OTUs | Best parametric model       | Accession no. |
| ICM_PML_Bv6.PML_85_2006_10_30   | 50.25    | 4.21      | 0         | 15.2              | 12066           | 2209.2                   | 381.8             | 758                 | Three mixed exponential     | SRP001188     |
| ICM_PML_Bv6.PML_86_2006_12_12   | 50.25    | 4.21      | 0         | 11.6              | 11210           | 3084.2                   | 426.7             | 927                 | Three mixed exponential     | SRP001189     |
| ICM_SPO_Bv6.SPO_0013_2008_01_31 | -19.16   | 146.88    | 15        | 28.6              | 15693           | 4562.3                   | 585.3             | 1247                | Three mixed exponential     | SRX011324     |
| ICM_SPO_Bv6.SPO_0014_2008_01_31 | -19.16   | 146.88    | 15        | 28.6              | 56429           | 8868.2                   | 777.7             | 2230                | Three mixed exponential     | SRX011325     |
| ICM_SPO_Bv6.SPO_0015_2008_01_31 | -19.16   | 146.88    | 15        | 28.6              | 12933           | 1498.4                   | 104               | 746                 | Three mixed exponential     | SRX011326     |
| ICM_SPO_Bv6.SPO_0016_2008_01_31 | -19.16   | 146.88    | 15        | 28.6              | 18815           | 4699.7                   | 428.1             | 1291                | Three mixed exponential     | SRX011327     |
| KCK_EEL_Bv6.winter              | 41.53    | -70.67    | 1         | 5.5               | 16699           | 5601                     | 1637.4            | 1259                | Four mixed exponential      | SRP001544     |
| KCK_HOT_Bv6.HOT177_5            | 22.75    | -158.00   | 5         | 23.8              | 20813           | 3380                     | 618.9             | 1296                | Four mixed exponential      | SRX011460     |
| KCK_HOT_Bv6.HOT180_5            | 22.75    | -158.00   | 5         | 23.6              | 25496           | 1326.9                   | 113.1             | 634                 | Three mixed exponential     | SRX011462     |
| KCK_HOT_Bv6.HOT181_5            | 22.75    | -158.00   | 5         | 24.7              | 22075           | 2227.7                   | 654.6             | 455                 | Four mixed exponential      | SRX011464     |
| KCK_HOT_Bv6.HOT183_5            | 22.75    | -158.00   | 5         | 25.6              | 30409           | 2527.3                   | 659.3             | 704                 | Two mixed exponential       | SRX011466     |
| KCK_HOT_Bv6.HOT185_10           | 22.75    | -158.00   | 10        | 25.6              | 40098           | 1611.9                   | 247.7             | 612                 | Three mixed exponential     | SRX011468     |
| KCK_HOT_Bv6.HOT186_10           | 22.75    | -158.00   | 10        | 26.3              | 21425           | 1220.7                   | 178.5             | 569                 | Two mixed exponential       | SRX011470     |
| KCK_HOT_Bv6.HOT186_100          | 22.75    | -158.00   | 100       | 26.3              | 22411           | 2498.9                   | 365.5             | 860                 | Three mixed exponential     | SRX011471     |
| KCK_HOT_Bv6.HOT186_125          | 22.75    | -158.00   | 125       | 26.3              | 22535           | 1824.7                   | 619.4             | 749                 | Three mixed exponential     | SRX011473     |
| KCK_HOT_Bv6.HOT186_175          | 22.75    | -158.00   | 175       | 26.3              | 12915           | 1220.6                   | 103.6             | 648                 | Three mixed exponential     | SRX011474     |
| KCK_HOT_Bv6.HOT186_75           | 22.75    | -158.00   | 75        | 26.3              | 21690           | 1461.7                   | 285.7             | 646                 | Three mixed exponential     | SRX011480     |
| KCK_HOT_Bv6.HOT188_10           | 22.75    | -158.00   | 10        | 24.8              | 27722           | 911.6                    | 44.4              | 571                 | Two mixed exponential       | SRX011482     |
| KCK_HOT_Bv6.HOT189_10           | 22.75    | -158.00   | 10        | 23.4              | 20479           | 1086.7                   | 81                | 546                 | Three mixed exponential     | SRX011484     |
| KCK_HOT_Bv6.HOT189_100          | 22.75    | -158.00   | 100       | 23.4              | 21144           | 3299.8                   | 769               | 893                 | 2b: Three mixed exponential | SRX011485     |
| KCK_HOT_Bv6.HOT189_125          | 22.75    | -158.00   | 125       | 23.4              | 14477           | 1570.9                   | 270.3             | 673                 | Three mixed exponential     | SRX011487     |
| KCK_HOT_Bv6.HOT189_175          | 22.75    | -158.00   | 175       | 23.4              | 15372           | 2851.9                   | 1061.4            | 855                 | Three mixed exponential     | SRX011488     |
| KCK_HOT_Bv6.HOT189_75           | 22.75    | -158.00   | 75        | 23.4              | 8400            | 908.3                    | 204.7             | 317                 | Three mixed exponential     | SRX011492     |
| KCK_HOT_Bv6.HOT190_5            | 22.75    | -158.00   | 5         | 23.4              | 19199           | 2596.2                   | 823.7             | 549                 | Four mixed exponential      | SRX011494     |
| KCK_HOT_Bv6.HOT191_5            | 22.75    | -158.00   | 5         | 23.9              | 43728           | 3201.8                   | 1251              | 786                 | Three mixed exponential     | SRX011496     |
| KCK_HOT_Bv6.HOT193_5            | 22.75    | -158.00   | 5         | 25.5              | 62155           | 2128.6                   | 247.3             | 884                 | Three mixed exponential     | SRX011498     |
| KCK_HOT_Bv6.HOT194_10           | 22.75    | -158.00   | 10        | 25.9              | 16276           | 2010.5                   | 713.4             | 551                 | Four mixed exponential      | SRX011500     |
| KCK_HOT_Bv6.HOT194_100          | 22.75    | -158.00   | 100       | 25.9              | 20624           | 1510.6                   | 157.1             | 733                 | Three mixed exponential     | SRX011501     |
| KCK_HOT_Bv6.HOT194_125          | 22.75    | -158.00   | 125       | 25.9              | 10789           | 1107.5                   | 39.2              | 709                 | Two mixed exponential       | SRX011503     |
| KCK_HOT_Bv6.HOT194_175          | 22.75    | -158.00   | 175       | 25.9              | 12381           | 2056.6                   | 380               | 943                 | Four mixed exponential      | SRX011504     |
| KCK_HOT_Bv6.HOT194_75           | 22.75    | -158.00   | 75        | 25.9              | 23475           | 998.7                    | 30.5              | 711                 | Two mixed exponential       | SRX011507     |
| KCK_KNX_Bv6.KNX_0001_2006_12_21 | -23.85   | -165.64   | 100       | 25.1              | 7578            | 1033                     | 93.7              | 471                 | Three mixed exponential     | SRP001542     |
| KCK_KNX_Bv6.KNX_0002_2006_12_24 | -26.05   | -156.89   | 110       | 23.7              | 22586           | 2173.7                   | 204.3             | 971                 | Three mixed exponential     | SRP001543     |
| KCK_KNX_Bv6.KNX_0003_2006_12_27 | -27.94   | -148.59   | 120       | 23.7              | 20120           | 2123.4                   | 216.1             | 896                 | Three mixed exponential     | SRP001544     |
| KCK_KNX_Bv6.KNX_0004_2006_12_30 | -26.48   | -137.94   | 150       | 19.2              | 17031           | 1944.9                   | 210.7             | 883                 | Three mixed exponential     | SRP001545     |
| KCK_KNX_Bv6.KNX_0005_2007_01_01 | -28.45   | -131.39   | 145       | 24.1              | 21616           | 2180.1                   | 171.2             | 1006                | Three mixed exponential     | SRP001546     |
| KCK_KNX_Bv6.KNX_0006_2007_01_07 | -27.74   | -117.62   | 200       | 24.4              | 28543           | 3015.5                   | 357.1             | 1205                | Four mixed exponential      | SRP001547     |
| KCK_KNX_Bv6.KNX_0007_2007_01_11 | -38.06   | -133.09   | 110       | 17.5              | 19808           | 1815.9                   | 504               | 632                 | Three mixed exponential     | SRP001548     |
| KCK_KNX_Bv6.KNX_0008_2007_01_13 | -39.31   | -139.80   | 100       | 16.4              | 14199           | 1117.4                   | 121.6             | 529                 | Three mixed exponential     | SRP001549     |
| KCK_NADW_Bv6.S13                | 4.78     | -15.07    | 100       | 28.4              | 6593            | 1180.5                   | 341.9             | 319                 | Three mixed exponential     | SRX012190     |
| KCK_NADW_Bv6.S23                | 0.69     | -14.24    | 99        | 25.8              | 12502           | 1219.9                   | 82.1              | 662                 | Three mixed exponential     | SRX012201     |
| KCK_NADW_Bv6.S29                | -4.09    | -15.91    | 101       | 25.5              | 12344           | 2660.9                   | 1312.7            | 635                 | Three mixed exponential     | SRX012207     |
| KCK_NADW_Bv6.S41                | 16.83    | -26.00    | 100       | 24.8              | 43670           | 3418.3                   | 162.8             | 1587                | Two mixed exponential       | SRX012221     |

| Sample_ID            | Metadata |           |           |                   | No. of sequeces | Richness                 |                   |                     | SRA                       |               |
|----------------------|----------|-----------|-----------|-------------------|-----------------|--------------------------|-------------------|---------------------|---------------------------|---------------|
|                      | Latitude | Longitude | Depth (m) | Temperature (SST) |                 | Estimate from best model | Confidence bounds | Total observed OTUs | Best parametric model     | Accession no. |
| KCK_NADW_Bv6.S47     | 21.09    | -23.11    | 99        | 23.3              | 11733           | 1408.9                   | 76.8              | 696                 | Two mixed exponential     | SRX012227     |
| KCK_NADW_Bv6.S6      | 11.83    | -20.16    | 100       | 27.9              | 61413           | 13519.3                  | 4629.3            | 2370                | Four mixed exponential    | SRX012229     |
| LTR_PAL_Bv6.PAL_1_1B | -64.94   | -64.41    | 10.6      | 1.0               | 1992            | 542.5                    | 246.7             | 103                 | Two mixed exponential     | SRA059385     |
| LTR_PAL_Bv6.PAL_1_2B | -64.94   | -64.41    | 10.6      | 1.0               | 1226            | 133.5                    | 24.3              | 66                  | Two mixed exponential     | SRA059385     |
| LTR_PAL_Bv6.PAL_2_1B | -64.94   | -64.41    | 99.9      | -0.1              | 1384            | 389.5                    | 36.2              | 201                 | Two mixed exponential     | SRA059385     |
| LTR_PAL_Bv6.PAL_2_2B | -64.94   | -64.41    | 99.9      | -0.1              | 10070           | 1024.4                   | 102.1             | 480                 | Three mixed exponential   | SRA059385     |
| LTR_PAL_Bv6.PAL_3_1B | -63.97   | -66.86    | 12.765    | 0.6               | 16457           | 408.2                    | 78.5              | 185                 | Three mixed exponential   | SRA059385     |
| LTR_PAL_Bv6.PAL_3_2B | -63.97   | -66.86    | 12.765    | 0.6               | 1219            | 118.2                    | 18.2              | 73                  | Two mixed exponential     | SRA059385     |
| LTR_PAL_Bv6.PAL_4_1B | -63.97   | -66.86    | 98.606    | -1.0              | 14088           | 426.2                    | 32.1              | 257                 | Two mixed exponential     | SRA059385     |
| LTR_PAL_Bv6.PAL_4_2B | -63.97   | -66.86    | 98.606    | -1.0              | 15467           | 655.4                    | 123.2             | 278                 | Three mixed exponential   | SRA059385     |
| LTR_PAL_Bv6.PAL_5_1B | -66.45   | -73.03    | 11.857    | 0.9               | 1944            | 128.4                    | 17.1              | 77                  | Two mixed exponential     | SRA059385     |
| LTR_PAL_Bv6.PAL_5_2B | -66.45   | -73.03    | 11.857    | 0.9               | 9901            | 295.9                    | 116.8             | 128                 | Two mixed exponential     | SRA059385     |
| LTR_PAL_Bv6.PAL_6_1B | -66.45   | -73.03    | 124.62    | 1.2               | 8585            | 921.3                    | 124.6             | 394                 | Three mixed exponential   | SRA059385     |
| LTR_PAL_Bv6.PAL_6_2B | -66.45   | -73.03    | 124.62    | 1.2               | 12721           | 2247.6                   | 1027.6            | 477                 | Four mixed exponential    | SRA059385     |
| LTR_PAL_Bv6.PAL_7_1B | -67.90   | -69.62    | 14.932    | 0.6               | 3602            | 197.6                    | 25.3              | 111                 | Two mixed exponential     | SRA059385     |
| LTR_PAL_Bv6.PAL_7_2B | -67.90   | -69.62    | 14.932    | 0.6               | 1267            | 356.6                    | 110               | 98                  | Two mixed exponential     | SRA059385     |
| LTR_PAL_Bv6.PAL_8_1B | -67.90   | -69.62    | 99.821    | -1.0              | 15261           | 898.9                    | 167.7             | 374                 | Three mixed exponential   | SRA059385     |
| LTR_PAL_Bv6.PAL_8_2B | -67.90   | -69.62    | 99.821    | -1.0              | 22263           | 909.6                    | 79.4              | 436                 | Two mixed exponential     | SRA059385     |
| LTR_PAL_Bv6.PAL_9_1B | -64.94   | -64.41    | 10        | 0.0               | 9027            | 3791                     | 1281.4            | 433                 | 2b:Four mixed exponential | SRA059385     |
| LTR_PAL_Bv6.PAL_9_2B | -64.94   | -64.41    | 10        | 0.0               | 9383            | 2076                     | 512.5             | 448                 | Three mixed exponential   | SRA059385     |
